# Supplementary material for: Common Polymorphisms in the 5-Lipoxygenase Pathway and Risk of Incident Myocardial Infarction: A Danish Case-Cohort Study
Source: PubMed Central journal article supplement (PMC5125697; doi:10.1371/journal.pone.0167217), 2016-11-28
Supplement: pone.0167217.s002.pdf [file pone.0167217.s002.pdf]

**S1 Table. Association of selected single nucleotide polymorphisms with incident myocardial infarction (sex-stratified analyses).**

| SNP           | Genotype | Men              |          |       |                  |          |       | Women            |          |       |                  |          |       |
|---------------|----------|------------------|----------|-------|------------------|----------|-------|------------------|----------|-------|------------------|----------|-------|
|               |          | Model A1*        |          |       | Model A2**       |          |       | Model A1*        |          |       | Model A2**       |          |       |
|               |          | $\rho^a$         | $\rho^b$ |       | $\rho^a$         | $\rho^b$ |       | $\rho^a$         | $\rho^b$ |       | $\rho^a$         | $\rho^b$ |       |
| <b>ALOX-5</b> |          |                  |          |       |                  |          |       |                  |          |       |                  |          |       |
| rs12762303    | T/T      | 1 (ref)          |          |       | 1 (ref)          |          |       | 1 (ref)          |          |       | 1 (ref)          |          |       |
|               | C/T      | 0.99 (0.85;1.16) | 0.90     | -     | 1.00 (0.84;1.18) | >0.99    | -     | 0.83 (0.67;1.02) | 0.08     | -     | 0.83 (0.66;1.05) | 0.12     | -     |
|               | C/C      | 1.46 (0.89;2.39) | 0.13     | -     | 1.71 (1.03;2.84) | 0.04     | -     | 0.93 (0.51;1.71) | 0.82     | -     | 0.91 (0.45;1.85) | 0.80     | -     |
| rs59439148    | W/W      | 1 (ref)          |          |       | 1 (ref)          |          |       | 1 (ref)          |          |       | 1 (ref)          |          |       |
|               | W/V      | 0.98 (0.84;1.15) | 0.84     | -     | 1.01 (0.85;1.19) | 0.94     | -     | 0.83 (0.67;1.03) | 0.08     | -     | 0.81 (0.65;1.03) | 0.08     | -     |
|               | V/V      | 1.45 (0.95;2.20) | 0.09     | -     | 1.63 (1.06;2.52) | 0.03     | -     | 0.86 (0.51;1.46) | 0.59     | -     | 0.91 (0.50;1.65) | 0.75     | -     |
| <b>FLAP</b>   |          |                  |          |       |                  |          |       |                  |          |       |                  |          |       |
| rs17222814    | G/G      | 1 (ref)          |          |       | 1 (ref)          |          |       | 1 (ref)          |          |       | 1 (ref)          |          |       |
|               | G/A      | 0.90 (0.75;1.06) | 0.21     | 0.76  | 0.92 (0.77;1.10) | 0.36     | 0.93  | 0.98 (0.78;1.23) | 0.85     | >0.99 | 0.98 (0.76;1.26) | 0.85     | >0.99 |
|               | A/A      | 1.24 (0.64;2.42) | 0.52     | 0.99  | 1.14 (0.56;2.30) | 0.72     | >0.99 | 1.26 (0.57;2.80) | 0.57     | 0.99  | 1.34 (0.49;3.67) | 0.57     | 0.99  |
| rs4073259     | A/A      | 1 (ref)          |          |       | 1 (ref)          |          |       | 1 (ref)          |          |       | 1 (ref)          |          |       |
|               | A/G      | 0.96 (0.83;1.12) | 0.63     | >0.99 | 0.94 (0.81;1.10) | 0.48     | 0.98  | 0.90 (0.74;1.09) | 0.28     | 0.86  | 0.87 (0.70;1.08) | 0.21     | 0.76  |
|               | G/G      | 0.98 (0.79;1.21) | 0.85     | >0.99 | 0.97 (0.78;1.22) | 0.83     | >0.99 | 0.94 (0.70;1.26) | 0.66     | >0.99 | 0.95 (0.68;1.33) | 0.77     | >0.99 |
| rs10507391    | T/T      | 1 (ref)          |          |       | 1 (ref)          |          |       | 1 (ref)          |          |       | 1 (ref)          |          |       |
|               | T/A      | 1.02 (0.89;1.18) | 0.75     | >0.99 | 1.01 (0.86;1.17) | 0.94     | >0.99 | 0.94 (0.78;1.14) | 0.53     | 0.99  | 0.91 (0.73;1.12) | 0.37     | 0.94  |
|               | A/A      | 0.97 (0.78;1.21) | 0.79     | >0.99 | 1.01 (0.79;1.28) | 0.95     | >0.99 | 0.90 (0.66;1.23) | 0.52     | 0.99  | 0.93 (0.66;1.33) | 0.70     | >0.99 |
| rs4769874     | G/G      | 1 (ref)          |          |       | 1 (ref)          |          |       | 1 (ref)          |          |       | 1 (ref)          |          |       |
|               | G/A      | 0.97 (0.75;1.25) | 0.80     | >0.99 | 1.03 (0.78;1.35) | 0.86     | >0.99 | 0.95 (0.65;1.38) | 0.77     | >0.99 | 1.02 (0.68;1.53) | 0.94     | >0.99 |
|               | A/A      | 0.69 (0.10;4.76) | 0.71     | >0.99 | 1.14 (0.16;8.06) | 0.90     | >0.99 | -                | -        | -     | -                | -        | -     |
| rs9551963     | C/C      | 1 (ref)          |          |       | 1 (ref)          |          |       | 1 (ref)          |          |       | 1 (ref)          |          |       |
|               | C/A      | 0.86 (0.73;1.02) | 0.08     | 0.39  | 0.83 (0.70;0.99) | 0.04     | 0.21  | 0.86 (0.69;1.06) | 0.16     | 0.65  | 0.84 (0.65;1.07) | 0.16     | 0.65  |
|               | A/A      | 0.83 (0.69;1.00) | 0.06     | 0.29  | 0.78 (0.64;0.96) | 0.02     | 0.09  | 0.92 (0.71;1.18) | 0.50     | 0.98  | 0.86 (0.65;1.15) | 0.31     | 0.89  |
| rs9315050     | A/A      | 1 (ref)          |          |       | 1 (ref)          |          |       | 1 (ref)          |          |       | 1 (ref)          |          |       |
|               | A/G      | 1.01 (0.82;1.24) | 0.94     | >0.99 | 1.04 (0.83;1.29) | 0.74     | >0.99 | 1.10 (0.82;1.47) | 0.52     | 0.99  | 1.17 (0.85;1.61) | 0.34     | 0.92  |
|               | G/G      | 1.06 (0.36;3.10) | 0.92     | >0.99 | 1.42 (0.47;4.32) | 0.53     | 0.99  | 0.16 (0.02;1.28) | 0.08     | 0.41  | 0.16 (0.02;1.45) | 0.10     | 0.48  |
| rs17222842    | G/G      | 1 (ref)          |          |       | 1 (ref)          |          |       | 1 (ref)          |          |       | 1 (ref)          |          |       |
|               | G/A      | 0.98 (0.82;1.17) | 0.80     | >0.99 | 0.98 (0.81;1.18) | 0.83     | >0.99 | 0.97 (0.77;1.22) | 0.79     | >0.99 | 0.93 (0.72;1.20) | 0.57     | 0.99  |
|               | A/A      | 0.27 (0.12;0.59) | 0.00     | 0.01  | 0.28 (0.12;0.63) | 0.00     | 0.01  | 1.00 (0.41;2.43) | 0.99     | >0.99 | 1.01 (0.39;2.60) | 0.99     | >0.99 |
| <b>LTC4-S</b> |          |                  |          |       |                  |          |       |                  |          |       |                  |          |       |
| rs730012      | A/A      | 1 (ref)          |          |       | 1 (ref)          |          |       | 1 (ref)          |          |       | 1 (ref)          |          |       |
|               | A/C      | 1.12 (0.97;1.29) | 0.11     | -     | 1.11 (0.95;1.29) | 0.19     | -     | 1.09 (0.90;1.32) | 0.37     | -     | 1.00 (0.81;1.24) | >0.99    | -     |
|               | C/C      | 1.00 (0.78;1.27) | 0.98     | -     | 0.98 (0.76;1.27) | 0.91     | -     | 1.07 (0.78;1.48) | 0.67     | -     | 1.10 (0.76;1.59) | 0.61     | -     |
| <b>LTA4-H</b> |          |                  |          |       |                  |          |       |                  |          |       |                  |          |       |
| rs61937881    | C/C      | 1 (ref)          |          |       | 1 (ref)          |          |       | 1 (ref)          |          |       | 1 (ref)          |          |       |
|               | C/T      | 0.99 (0.86;1.15) | 0.93     | >0.99 | 0.96 (0.82;1.12) | 0.59     | >0.99 | 1.21 (1.00;1.46) | 0.05     | 0.26  | 1.25 (1.01;1.55) | 0.04     | 0.21  |
|               | T/T      | 1.16 (0.88;1.55) | 0.30     | 0.88  | 1.16 (0.86;1.58) | 0.33     | 0.91  | 1.24 (0.85;1.81) | 0.26     | 0.84  | 1.42 (0.95;2.13) | 0.09     | 0.42  |

|            |     |                  |      |       |                  |       |       |                  |       |       |                  |       |       |  |
|------------|-----|------------------|------|-------|------------------|-------|-------|------------------|-------|-------|------------------|-------|-------|--|
| rs2660880  | G/G | 1 (ref)          |      |       | 1 (ref)          |       |       | 1 (ref)          |       |       | 1 (ref)          |       |       |  |
|            | G/A | 1.10 (0.89;1.35) | 0.40 | 0.95  | 1.09 (0.87;1.37) | 0.45  | 0.97  | 1.03 (0.79;1.34) | 0.83  | >0.99 | 0.99 (0.72;1.34) | 0.93  | >0.99 |  |
|            | A/A | 0.57 (0.23;1.43) | 0.23 | 0.80  | 0.53 (0.21;1.37) | 0.19  | 0.72  | 1.53 (0.50;4.67) | 0.45  | 0.97  | 1.56 (0.46;5.23) | 0.48  | 0.98  |  |
| rs6538697  | T/T | 1 (ref)          |      |       | 1 (ref)          |       |       | 1 (ref)          |       |       | 1 (ref)          |       |       |  |
|            | T/C | 0.97 (0.80;1.18) | 0.76 | >0.99 | 1.00 (0.81;1.24) | 0.98  | >0.99 | 1.12 (0.87;1.44) | 0.40  | 0.95  | 1.04 (0.77;1.39) | 0.82  | >0.99 |  |
|            | C/C | 0.98 (0.39;2.45) | 0.97 | >0.99 | 1.00 (0.39;2.57) | >0.99 | >0.99 | 0.97 (0.21;4.53) | 0.97  | >0.99 | 1.15 (0.23;5.80) | 0.87  | >0.99 |  |
| rs1978331  | T/T | 1 (ref)          |      |       | 1 (ref)          |       |       | 1 (ref)          |       |       | 1 (ref)          |       |       |  |
|            | T/C | 0.99 (0.86;1.15) | 0.94 | >0.99 | 0.98 (0.83;1.14) | 0.76  | >0.99 | 1.22 (1.00;1.49) | 0.05  | 0.26  | 1.30 (1.04;1.62) | 0.02  | 0.12  |  |
|            | C/C | 1.12 (0.91;1.37) | 0.30 | 0.88  | 1.14 (0.92;1.43) | 0.24  | 0.80  | 1.24 (0.94;1.63) | 0.13  | 0.56  | 1.27 (0.93;1.74) | 0.13  | 0.56  |  |
| rs17677715 | T/T | 1 (ref)          |      |       | 1 (ref)          |       |       | 1 (ref)          |       |       | 1 (ref)          |       |       |  |
|            | T/C | 1.00 (0.86;1.15) | 0.95 | >0.99 | 0.96 (0.82;1.13) | 0.62  | >0.99 | 1.19 (0.98;1.44) | 0.09  | 0.42  | 1.32 (1.06;1.65) | 0.01  | 0.08  |  |
|            | C/C | 1.26 (0.85;1.86) | 0.25 | 0.83  | 1.30 (0.86;1.98) | 0.21  | 0.76  | 1.26 (0.75;2.12) | 0.37  | 0.94  | 1.31 (0.76;2.24) | 0.33  | 0.91  |  |
| rs2247570  | A/A | 1 (ref)          |      |       | 1 (ref)          |       |       | 1 (ref)          |       |       | 1 (ref)          |       |       |  |
|            | A/G | 0.94 (0.82;1.09) | 0.41 | 0.96  | 0.93 (0.80;1.08) | 0.33  | 0.91  | 1.18 (0.98;1.43) | 0.08  | 0.40  | 1.20 (0.97;1.48) | 0.10  | 0.45  |  |
|            | G/G | 1.28 (1.00;1.64) | 0.05 | 0.28  | 1.28 (0.98;1.67) | 0.07  | 0.35  | 1.11 (0.80;1.55) | 0.54  | 0.99  | 1.27 (0.88;1.82) | 0.20  | 0.74  |  |
| rs2660898  | T/T | 1 (ref)          |      |       | 1 (ref)          |       |       | 1 (ref)          |       |       | 1 (ref)          |       |       |  |
|            | T/G | 1.04 (0.90;1.20) | 0.57 | 0.99  | 1.02 (0.87;1.18) | 0.84  | >0.99 | 1.19 (0.99;1.44) | 0.07  | 0.35  | 1.22 (0.98;1.50) | 0.07  | 0.35  |  |
|            | G/G | 1.03 (0.81;1.30) | 0.82 | >0.99 | 1.05 (0.82;1.34) | 0.72  | >0.99 | 1.26 (0.93;1.72) | 0.14  | 0.58  | 1.27 (0.89;1.82) | 0.18  | 0.70  |  |
| rs2540482  | A/A | 1 (ref)          |      |       | 1 (ref)          |       |       | 1 (ref)          |       |       | 1 (ref)          |       |       |  |
|            | A/G | 0.92 (0.80;1.07) | 0.28 | 0.87  | 0.94 (0.80;1.09) | 0.40  | 0.95  | 1.00 (0.83;1.21) | 0.96  | >0.99 | 1.00 (0.81;1.23) | 0.97  | >0.99 |  |
|            | G/G | 1.10 (0.80;1.52) | 0.55 | 0.99  | 1.04 (0.74;1.46) | 0.84  | >0.99 | 0.88 (0.56;1.39) | 0.59  | >0.99 | 0.83 (0.50;1.37) | 0.46  | 0.98  |  |
| rs2540477  | T/T | 1 (ref)          |      |       | 1 (ref)          |       |       | 1 (ref)          |       |       | 1 (ref)          |       |       |  |
|            | T/C | 0.93 (0.81;1.07) | 0.32 | 0.90  | 0.95 (0.81;1.10) | 0.48  | 0.98  | 0.99 (0.82;1.20) | 0.95  | >0.99 | 0.96 (0.78;1.19) | 0.73  | >0.99 |  |
|            | C/C | 1.13 (0.81;1.56) | 0.48 | 0.98  | 1.06 (0.75;1.50) | 0.75  | >0.99 | 0.94 (0.60;1.48) | 0.80  | >0.99 | 0.94 (0.57;1.56) | 0.82  | >0.99 |  |
| rs2660845  | A/A | 1 (ref)          |      |       | 1 (ref)          |       |       | 1 (ref)          |       |       | 1 (ref)          |       |       |  |
|            | A/G | 0.91 (0.79;1.04) | 0.17 | 0.67  | 0.90 (0.78;1.05) | 0.18  | 0.70  | 1.00 (0.83;1.21) | >0.99 | >0.99 | 0.98 (0.79;1.20) | 0.83  | >0.99 |  |
|            | G/G | 1.05 (0.79;1.39) | 0.72 | 1.00  | 1.04 (0.77;1.41) | 0.78  | >0.99 | 0.98 (0.67;1.45) | 0.94  | >0.99 | 1.00 (0.65;1.55) | >0.99 | >0.99 |  |
| rs2540475  | C/C | 1 (ref)          |      |       | 1 (ref)          |       |       | 1 (ref)          |       |       | 1 (ref)          |       |       |  |
|            | C/T | 0.96 (0.83;1.11) | 0.58 | 0.99  | 0.93 (0.80;1.09) | 0.39  | 0.95  | 1.11 (0.92;1.35) | 0.28  | 0.86  | 1.12 (0.91;1.40) | 0.29  | 0.87  |  |
|            | T/T | 0.94 (0.66;1.33) | 0.74 | >0.99 | 0.96 (0.67;1.38) | 0.83  | >0.99 | 0.75 (0.47;1.20) | 0.23  | 0.78  | 0.79 (0.47;1.33) | 0.38  | 0.94  |  |

Abbreviations: SNP, Single nucleotide polymorphism; ALOX-5, Arachidonate 5-lipoxygenase; ALOX-5 AP, Arachidonate 5-lipoxygenase activating protein; LTC4-S, Leukotriene C4 synthase; LTA4-H, Leukotriene A4 hydroxylase.

The table displays hazard ratios from a weighted cox proportional hazards model. Results are presented for sex-stratified analyses. Alleles correspond to the positive DNA-strand according to dbSNP, human assembly GRCh38.p2.

\*Crude analyses. The pooled estimates are adjusted for sex.

\*\*Adjusted analyses including sex(pooled analyses), smoking status, educational level, physical activity, BMI, waist circumference and alcohol consumption.

<sup>a</sup>Crude *p*-value

<sup>b</sup>Adjusted *p*-value corrected for multiple testing within each candidate gene. From the composite LD correlation matrix the number of independent tests (*N*) were estimated.

Using Sidák corrections, we then calculated the adjusted *p*-value as:  $p^b = 1 - (1 - p^a)^N$ .
